# Supplementary material for: NephroCheck data compared to serum creatinine in various clinical settings
Source: BMC Nephrol. 2015 Dec 9;16:206. doi: 10.1186/s12882-015-0203-5 (PMC4674950; doi:10.1186/s12882-015-0203-5)
Supplement: Additional file 4: — Table B: Demographic data of the entire patient cohort ( n = 69). (XLSX 9 kb) [file 12882_2015_203_MOESM4_ESM.xlsx]

## Sheet: Sheet1
ALL n=69	Number of patient	Mean age	Sex female	Stage 1	Stage 2	Stage 3	No AKI	NC
AKIRisk <0,3	22	55.86	7	4	2	1	15	0
AKIRisk 0,3-2	32	60	11	6	9	6	6	5
AKIRisk >2	15	60	3	2	2	5	6	0
NEPHRO n=52	Number of patient	Mean age	Sex female	Stage 1	Stage 2	Stage 3	No AKI	NC
AKIRisk <0,3	19	54.68	5	3	2	1	13	0
AKIRisk 0,3-2	24	59	9	3	9	5	2	5
AKIRisk >2	9	65	3	1	2	5	1	0
ONCO n=17	Number of patient	Mean age	Sex female	Stage 1	Stage 2	Stage 3	No AKI	NC
AKIRisk <0,3	3	63.33	2	1	0	0	2	0
AKIRisk 0,3-2	8	65.38	2	3	0	1	4	0
AKIRisk >2	6	53	0	1	0	0	5	0
